# Supplementary material for: Copper(II) Complexes Containing Natural Flavonoid Pomiferin Show Considerable In Vitro Cytotoxicity and Anti-inflammatory Effects
Source: MDPI journal article supplement (doi:10.3390/ijms22147626), 2021-07-16
Supplement: s1 [file s1]

## Supplementary Materials

### Copper(II) complexes containing natural flavonoid pomiferin show considerable in vitro cytotoxicity and anti-inflammatory effects

Ján Vančo<sup>1</sup>, Zdeněk Trávníček<sup>1,\*</sup> Jan Hošek<sup>1</sup>, Tomáš Malina<sup>1</sup>, and Zdeněk Dvořák<sup>2</sup>

<sup>1</sup> Regional Centre of Advanced Technologies and Materials, Czech Advanced Technology and Research Institute (CATRIN), Palacký University, Šlechtitelů 27, CZ-783 71 Olomouc, Czech Republic, jan.vanco@upol.cz (J.V.); jan.hosek@upol.cz (J.H.); zdenek.travnicek@upol.cz (Z.T.)

<sup>2</sup> Department of Cell Biology and Genetics, Faculty of Science, Palacký University, Šlechtitelů 27, CZ-783 71 Olomouc, Czech Republic, zdenek.dvorak@upol.cz (Z.D.)

\* Correspondence: zdenek.travnicek@upol.cz (Z.T.)

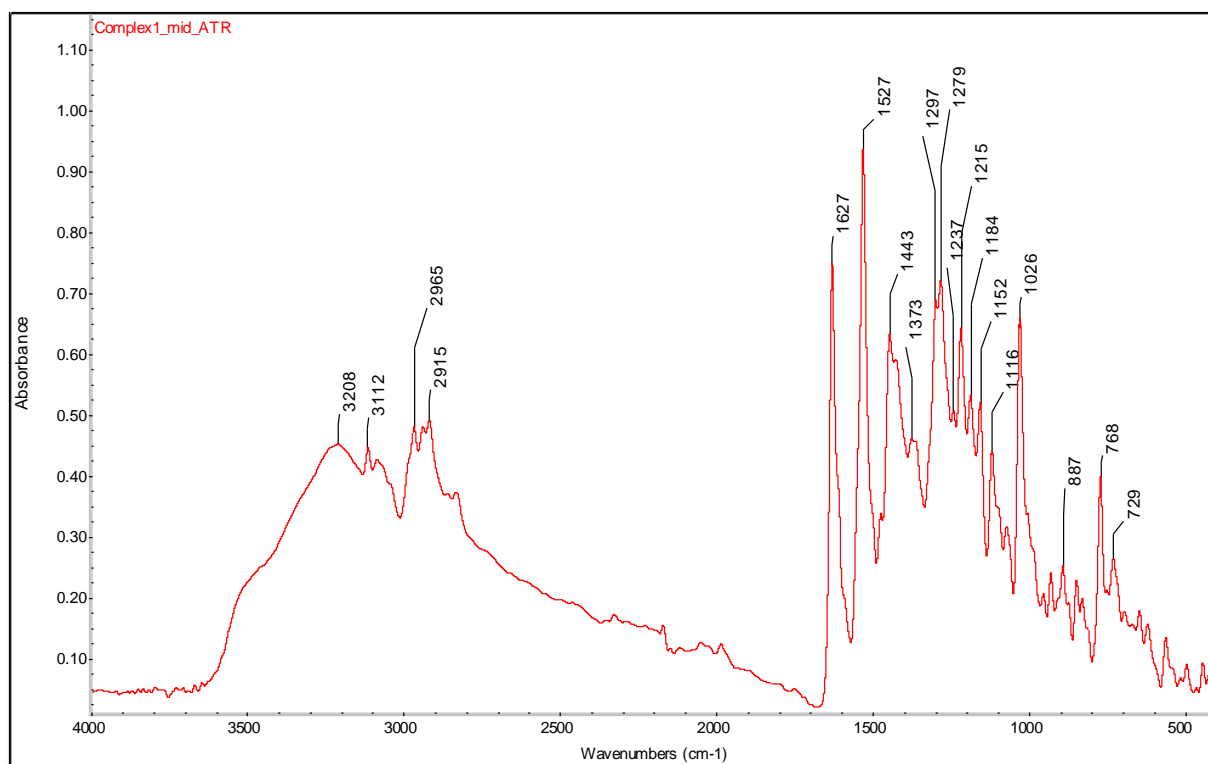

**Figure S1** IR Spectrum of [Cu(L)(bpy)]NO<sub>3</sub>·2MeOH (1).

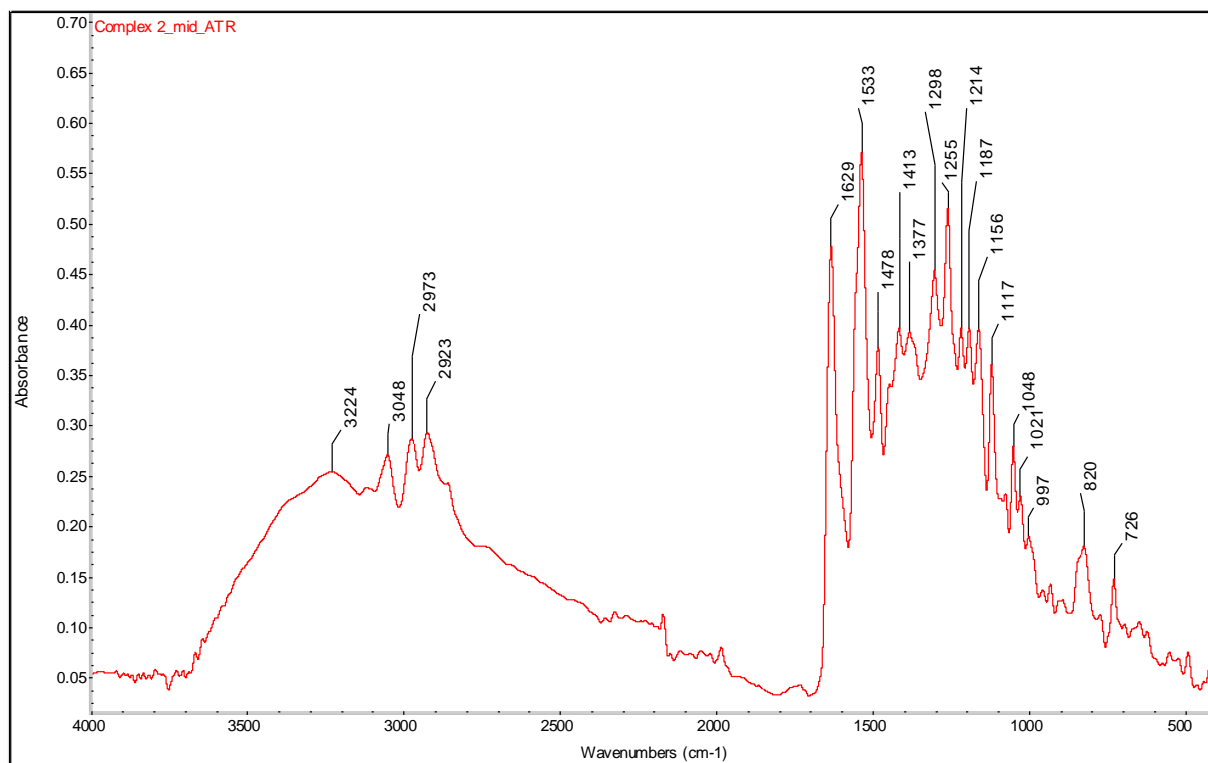

**Figure S2** IR Spectrum of [Cu(L)(dimebpy)]NO<sub>3</sub>·2H<sub>2</sub>O (2).

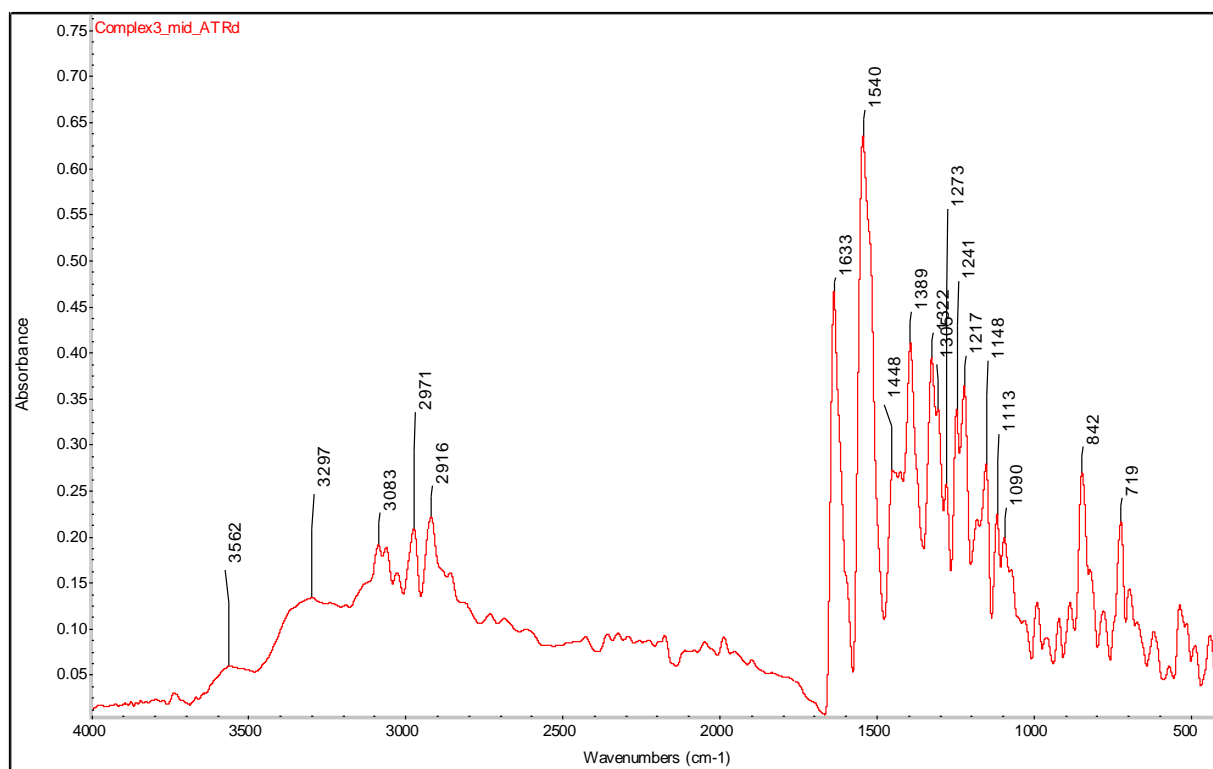

**Figure S3** IR Spectrum of [Cu(L)(phen)]NO<sub>3</sub>·2MeOH (**3**).

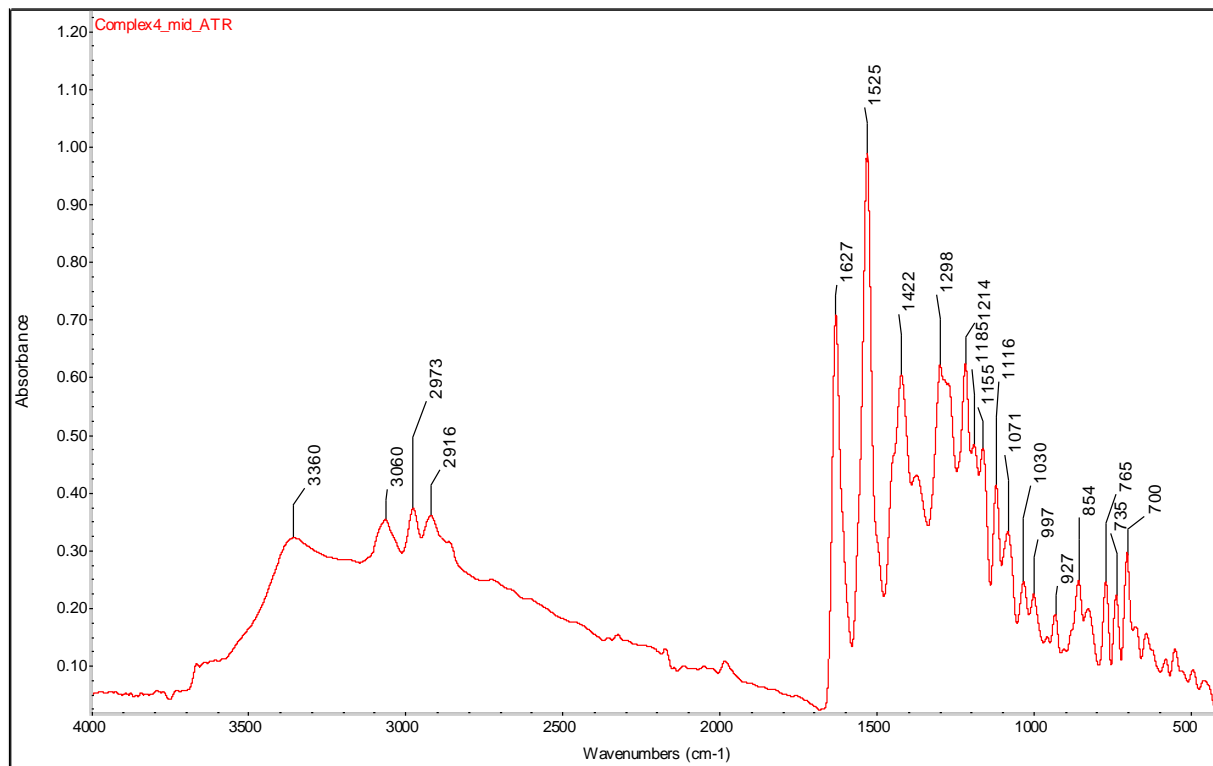

**Figure S4** IR Spectrum of [Cu(L)(bphen)]NO<sub>3</sub>·MeOH (**4**).

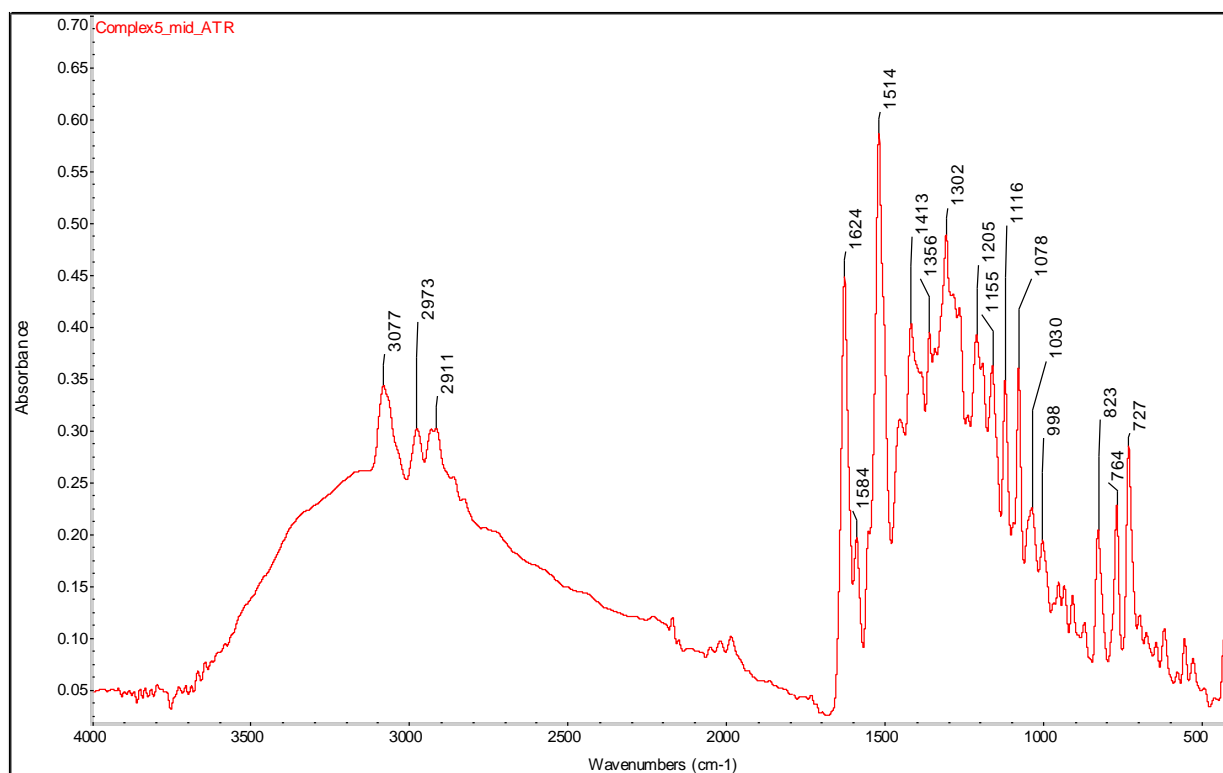

**Figure S5** IR Spectrum of [Cu(L)(dppz)]NO<sub>3</sub>·MeOH (5).

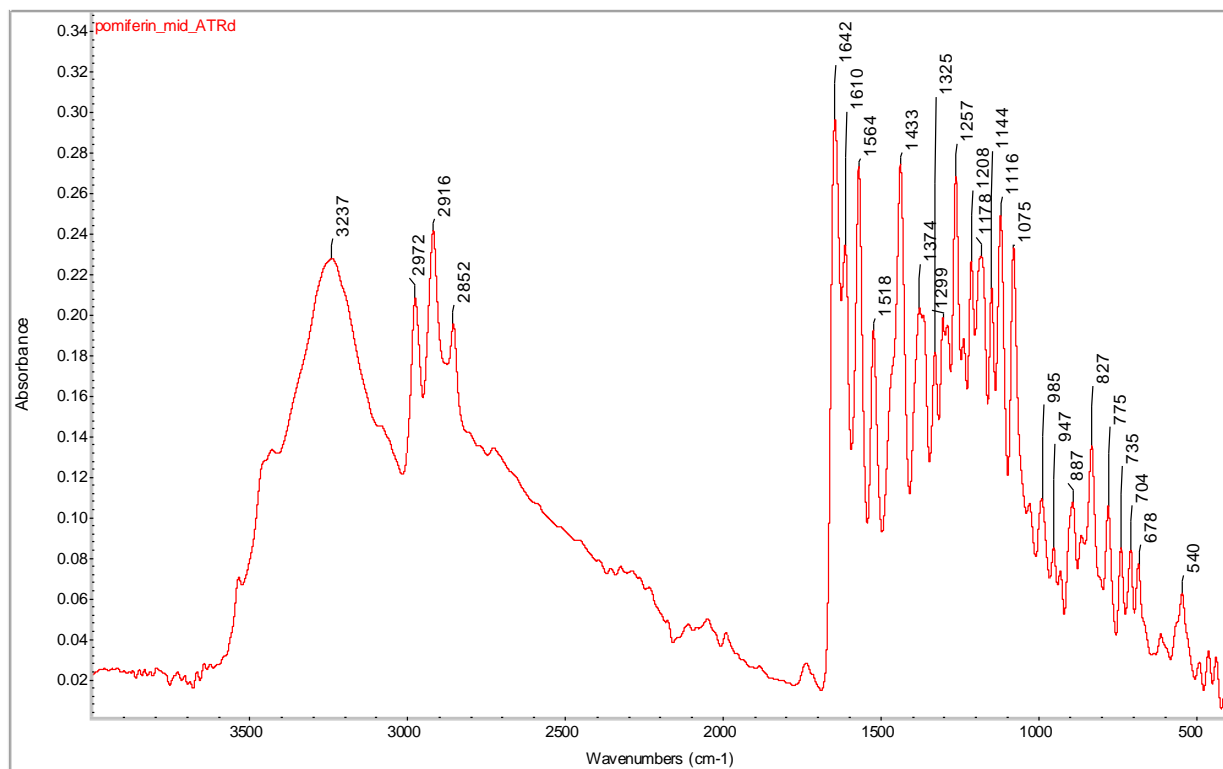

**Figure S6** IR Spectrum of pomiferin (HL).

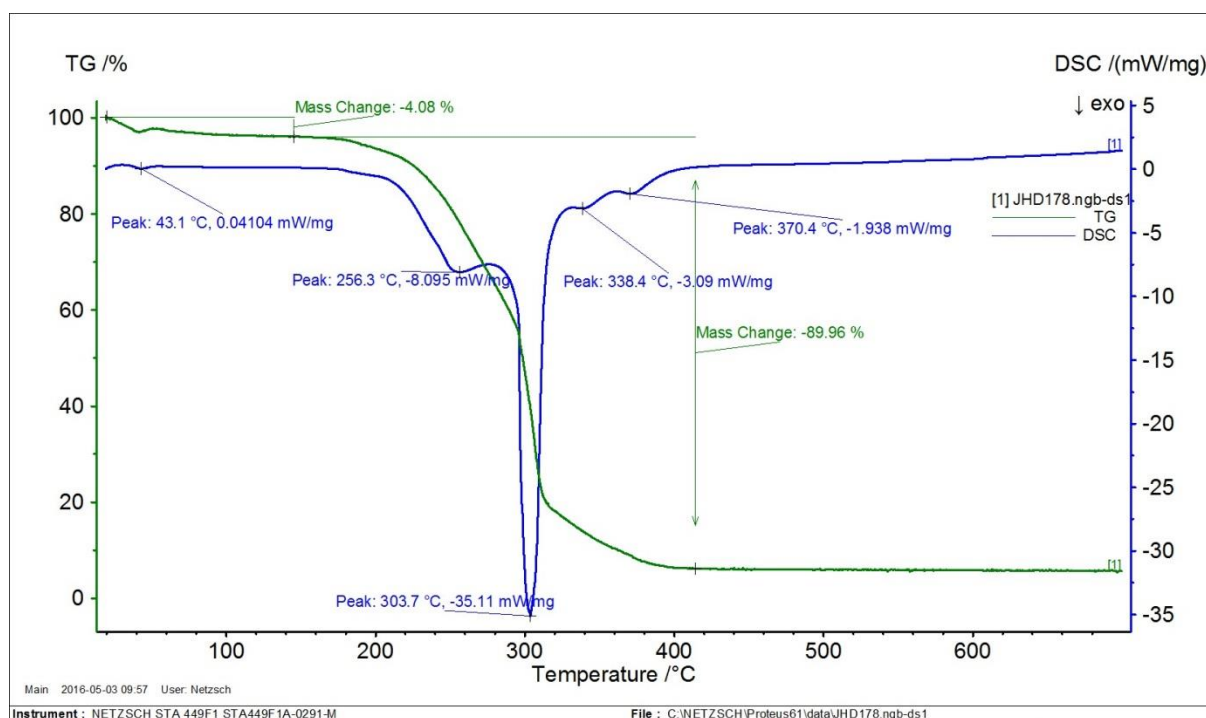

**Figure S7.** TG/DSC curves of [Cu(L)(bphen)]NO<sub>3</sub>·MeOH 4 (here labelled as JHD 178). The loss of the MeOH molecule is accompanied by a theoretical weight loss of 3.52% (an experimental weight loss = 4.08%).

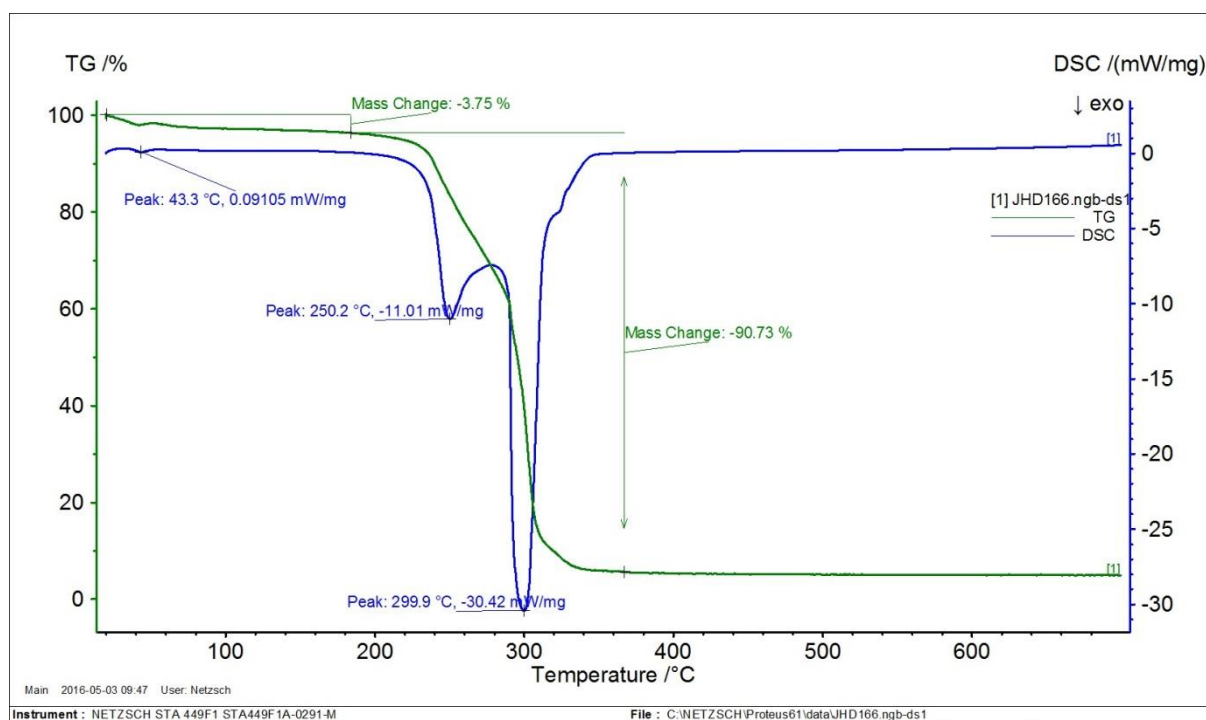

**Figure S8** TG/DSC curves of [Cu(L)(dppz)]NO<sub>3</sub>·MeOH 5 (here labelled as JHD 166). The elimination of the MeOH molecule is accompanied by a theoretical weight loss of 3.73% (an experimental weight loss = 3.75%).

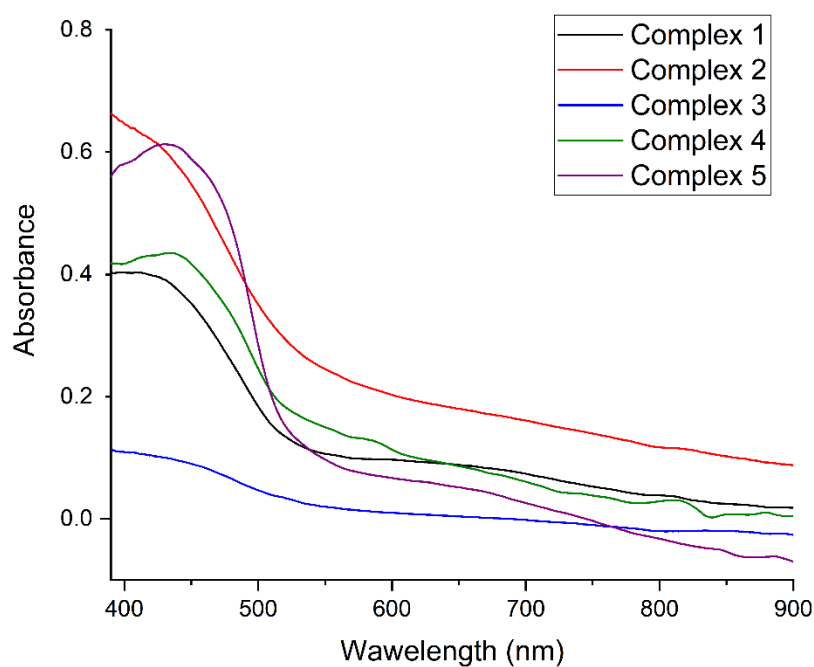

**Figure S9** Diffuse reflectance UV/Vis spectra of complexes **1–5** measured in solid state (Nujol mulls).

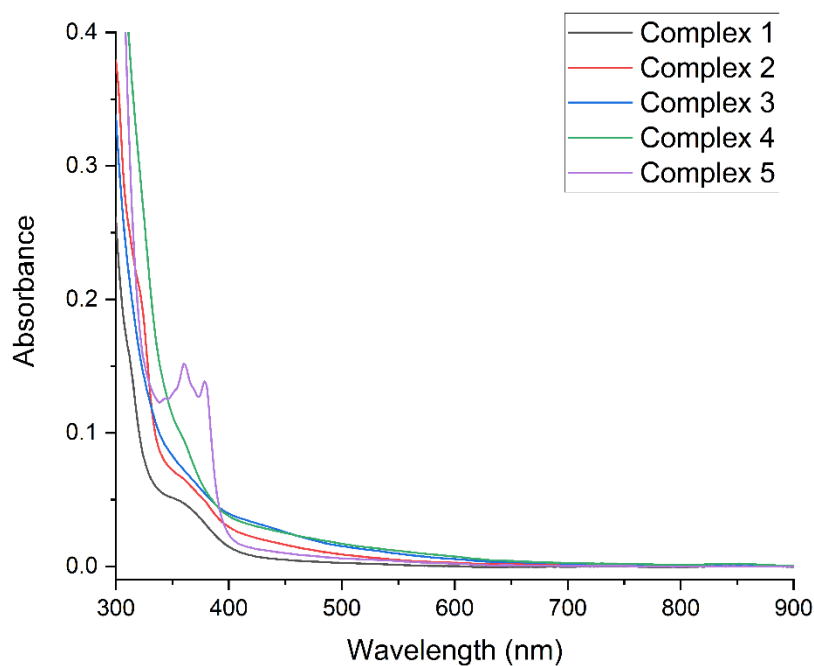

**Figure S10** UV/Vis spectra of complexes **1–5** measured in DMF solutions at the 10  $\mu\text{M}$  concentration.

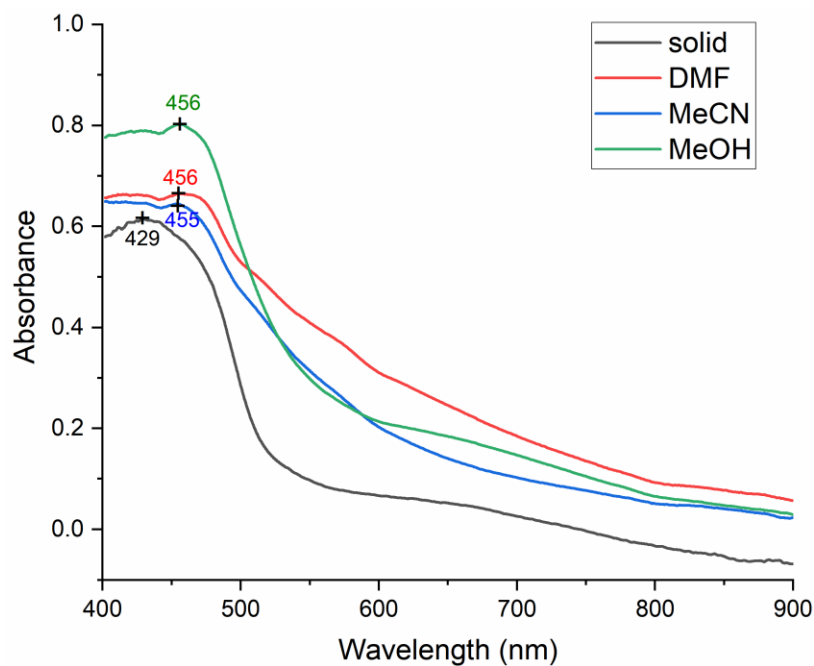

**Figure S11** UV/Vis spectra of  $[\text{Cu}(\text{L})(\text{dppz})]\text{NO}_3 \cdot \text{MeOH}$  **5** in DMF, MeCN and MeOH (each at 15 mM concentration), and in the solid state.

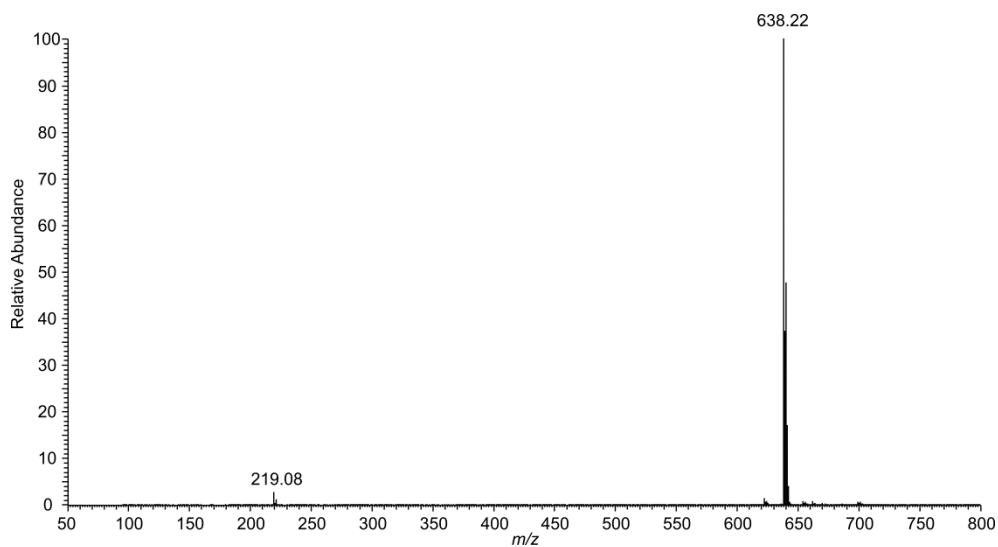

**Figure S12** Mass spectra (ESI+MS) of the complex **1** showing the dominant peak associated with the corresponding complex cations.

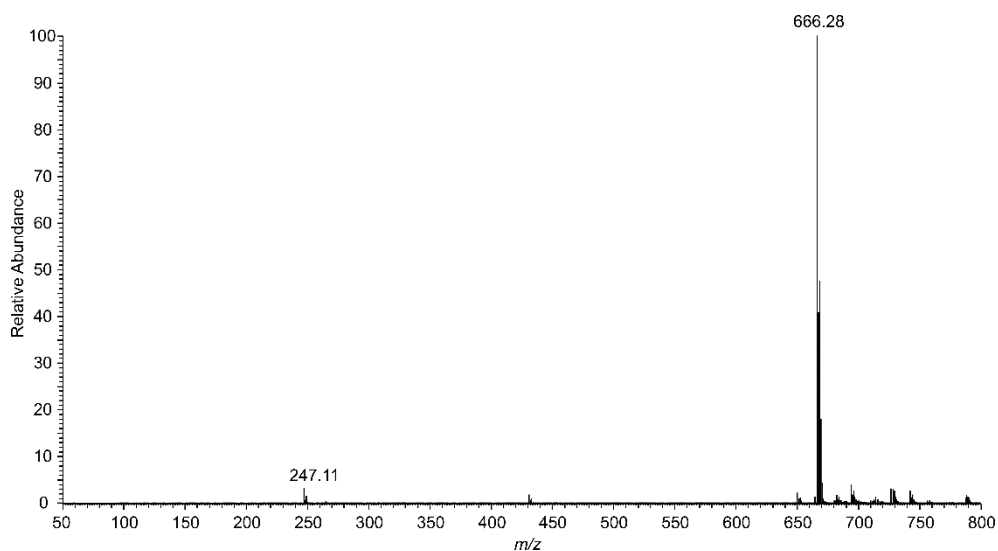

**Figure S13** Mass spectra (ESI+MS) of the complex **2** showing the dominant peak associated with the corresponding complex cations.

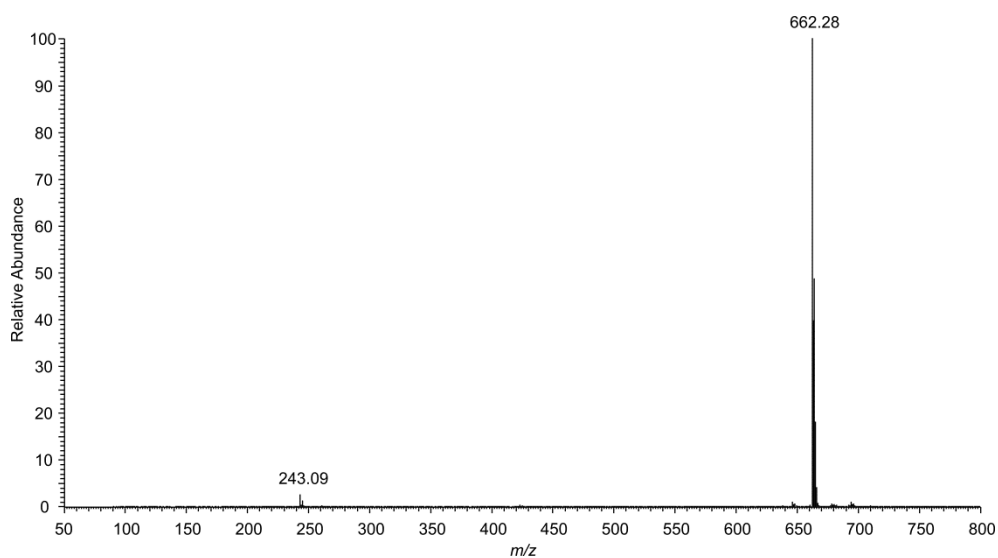

**Figure S14** Mass spectra (ESI+MS) of the complex **3** showing the dominant peak associated with the corresponding complex cations.

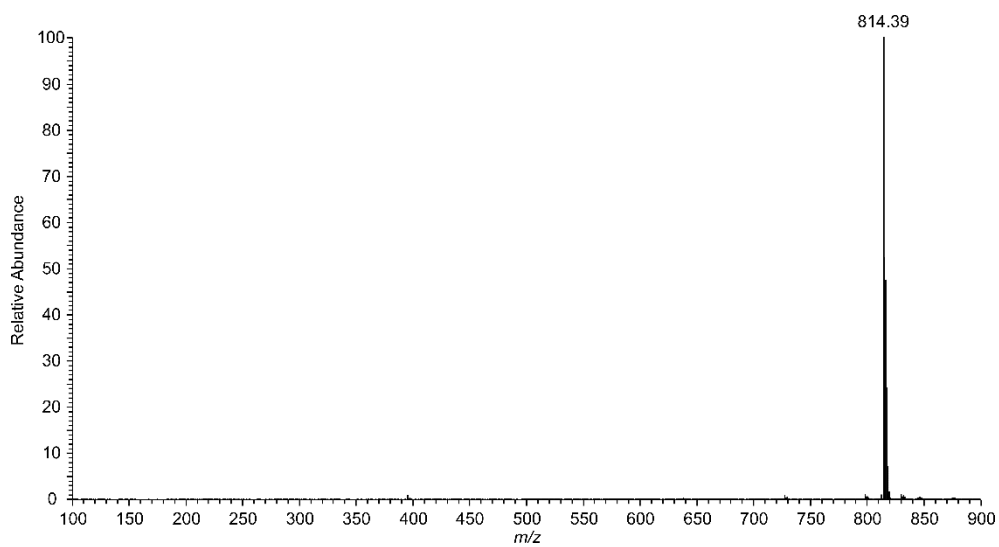

**Figure S15** Mass spectra (ESI+MS) of the complex **4** showing the dominant peak associated with the corresponding complex cations.

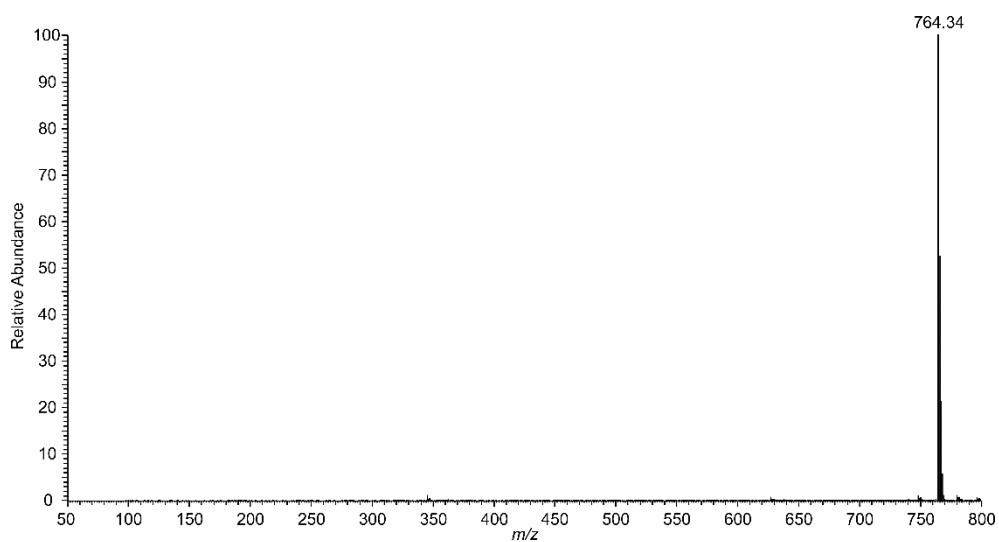

**Figure S16** Mass spectra (ESI+MS) of the complex **5** showing the dominant peak associated with the corresponding complex cations.

**Table S1** The values of molar conductivity of complexes **1–5** in different solvents.

| <b>Complex</b>  | $\Lambda_M(\text{MeCN})$<br>[S cm <sup>2</sup> mol <sup>-1</sup> ] | $\Lambda_M(\text{MeOH})$<br>[S cm <sup>2</sup> mol <sup>-1</sup> ] | $\Lambda_M(\text{DMF})$<br>[S cm <sup>2</sup> mol <sup>-1</sup> ] |
|-----------------|--------------------------------------------------------------------|--------------------------------------------------------------------|-------------------------------------------------------------------|
| <b>1</b>        | 143                                                                | 83                                                                 | 68                                                                |
| <b>2</b>        | 132                                                                | 84                                                                 | 82                                                                |
| <b>3</b>        | 143                                                                | 81                                                                 | 85                                                                |
| <b>4</b>        | 138                                                                | 81                                                                 | 80                                                                |
| <b>5</b>        | n.m.                                                               | 104                                                                | 78                                                                |
| Reference data* | 120-160                                                            | 80-115                                                             | 65-90                                                             |

\* Reference data for 1:1 electrolytes in the corresponding solvent, ref. W.J. Geary, The use of conductivity measurements in organic solvents for the characterization of coordination compounds, Coord. Chem. Rev. 7 (1971) 81–122. n.m. = not measured.
